# Supplementary material for: Metabolomics and Lipidomics Study Unveils the Impact of Tauroursodeoxycholic Acid on Hyperlipidemic Mice
Source: MDPI journal article supplement (doi:10.3390/molecules28176352), 2023-08-30
Supplement: s1 [file s1]

**Table S1.** The sequences of primers for LCAT, LPCAT1, LPCAT2, LPCAT3 and 18S used in this study.

| Gene Name | Forward Primers (5'-3') | Reverse Primers (5'-3')  |
|-----------|-------------------------|--------------------------|
| LCAT      | CTGGCTCCTCAATGTGCTCTTC  | AGAAGTCCTCTGTCTTACGGTAGC |
| LPCAT 1   | AGAGTGGTGGTGGTGAGATTGAC | CTGGATGGTGGCTAAGGTCTGG   |
| LPCAT 2   | TGAGGACGGCTACATAACAGAGG | CTGGGTGCTTTAGGGCGAAAC    |
| LPCAT3    | AAGCAGGTCAGCAGTCTAATTCG | GGCAGAAGGCAGTCATAGAGTAAC |
| 18 S      | AGTTCCAGCACATTTTGCGAG   | TCATCCTCCGTGAGTTCTCCA    |

LCAT, lecithin cholesterol acyltransferase; LPCAT, Lysophosphatidylcholine Acyltransferase .

**Table S2.** The levels of TC, TG, HDL-C, LDL-C, ALT, and AST in serum.

| Group       | TC(mmol/L)    | TG(mmol/L)    | HDL-C(mmol/L) | LDL-C(mmol/L) | ALT(U/L)      | AST(U/L)     |
|-------------|---------------|---------------|---------------|---------------|---------------|--------------|
| Control     | 1.332±0.153   | 0.561±0.038   | 3.923±0.349   | 3.618±0.589   | 4.281±0.270   | 9.889±1.138  |
| Model       | 2.842±0.311## | 0.938±0.058## | 2.990±0.227#  | 6.654±0.644## | 4.576±0.319## | 10.470±1.028 |
| Fenofibrate | 2.154±0.232*  | 0.728±0.068** | 3.605±0.284*  | 4.845±0.617*  | 6.342±0.713   | 10.889±1.926 |
| TUDCA-L     | 2.786±0.337   | 0.853±0.058   | 3.124±0.157   | 5.726±0.242   | 4.632±0.405   | 10.017±1.074 |
| TUDCA-M     | 2.612±0.280   | 0.792±0.060*  | 3.380±0.427   | 5.600±0.386   | 4.725±0.334   | 10.303±1.376 |
| TUDCA-H     | 2.226±0.207*  | 0.742±0.068** | 3.559±0.232*  | 4.971±0.242*  | 4.473±0.267   | 10.421±0.976 |

**Table S3.** Detection of hyperlipidemia related metabolites in serum by UPLC-MS. Trend 1 is Control group compared with Model group; Trend 2 is Model group compared with TUDCA-H group.

| No. | Metabolite name               | TR<br>(min) | m/z      | Formula                                                       | VIP  | <i>p</i> Value        | Fold<br>change | Trend 1 | Trend 2 | Scan<br>mode |
|-----|-------------------------------|-------------|----------|---------------------------------------------------------------|------|-----------------------|----------------|---------|---------|--------------|
| 1   | Sodium glycocholate           | 9.52        | 488.30   | C <sub>26</sub> H <sub>43</sub> NO <sub>6</sub>               | 2.93 | 1.18×10 <sup>-3</sup> | 1.94           | ↓       | -       | +            |
| 2   | PI(18:0/22:4(7Z,10Z,13Z,16Z)) | 15.36       | 937.57   | C <sub>49</sub> H <sub>87</sub> O <sub>13</sub> P             | 3.55 | 2.80×10 <sup>-4</sup> | 3.95           | ↓       | -       | +            |
| 3   | PI(16:1(9Z)/16:0)             | 12.97       | 853.51   | C <sub>41</sub> H <sub>77</sub> O <sub>13</sub> P             | 3.20 | 6.26×10 <sup>-4</sup> | 3.44           | ↑       | -       | -            |
| 4   | PE(18:1(9Z)/18:1(9Z))         | 13.70       | 744.55   | C <sub>41</sub> H <sub>78</sub> NO <sub>8</sub> P             | 1.37 | 4.22×10 <sup>-2</sup> | 1.89           | ↑       | -       | +            |
| 5   | PC(18:0/14:0)                 | 13.17       | 756.55   | C <sub>40</sub> H <sub>80</sub> NO <sub>8</sub> P             | 1.44 | 3.64×10 <sup>-2</sup> | 2.32           | ↑       | -       | +            |
| 6   | Prostaglandin D1              | 7.94        | 353.23   | C <sub>20</sub> H <sub>34</sub> O <sub>5</sub>                | 3.31 | 4.89×10 <sup>-4</sup> | 3.37           | ↑       | -       | -            |
| 7   | Acetaminophen                 | 17.33       | 210.06   | C <sub>8</sub> H <sub>9</sub> NO <sub>2</sub>                 | 2.83 | 1.48×10 <sup>-3</sup> | 1.05           | -       | ↑       | -            |
| 8   | Threonic acid                 | 0.86        | 137.04   | C <sub>4</sub> H <sub>8</sub> O <sub>5</sub>                  | 3.90 | 1.25×10 <sup>-4</sup> | 3.85           | ↓       | -       | +            |
| 9   | 3-Hydroxyisovaleric acid      | 14.74       | 117.06   | C <sub>5</sub> H <sub>10</sub> O <sub>3</sub>                 | 3.45 | 3.51×10 <sup>-4</sup> | 1.23           | ↑       | ↓       | -            |
| 10  | Hydroxykynurenine             | 0.49        | 223.07   | C <sub>10</sub> H <sub>12</sub> N <sub>2</sub> O <sub>4</sub> | 9.00 | 1.01×10 <sup>-9</sup> | 1.53           | -       | ↑       | -            |
| 11  | Estrone                       | 3.99        | 293.15   | C <sub>18</sub> H <sub>22</sub> O <sub>2</sub>                | 2.34 | 4.53×10 <sup>-3</sup> | 2.27           | ↑       | -       | +            |
| 12  | Glycocholic acid              | 9.09        | 488.30   | C <sub>26</sub> H <sub>43</sub> NO <sub>6</sub>               | 6.00 | 1.01×10 <sup>-6</sup> | 1.86           | ↓       | -       | +            |
| 13  | Capric acid                   | 0.76        | 217.1461 | C <sub>10</sub> H <sub>20</sub> O <sub>2</sub>                | 1.67 | 2.12×10 <sup>-2</sup> | 1.42           | -       | ↑       | -            |
| 14  | Acetaminophen glucuronide     | 3.12        | 326.0892 | C <sub>14</sub> H <sub>17</sub> NO <sub>8</sub>               | 1.7  | 2.01×10 <sup>-2</sup> | 1.15           | ↓       | -       | -            |
| 15  | Norcotinine                   | 3.15        | 161.0721 | C <sub>9</sub> H <sub>10</sub> N <sub>2</sub> O               | 3.07 | 8.47×10 <sup>-4</sup> | 1.43           | -       | ↑       | -            |

**Table S4.** Detection of hyperlipidemia related lipid metabolism in serum by UPLC-MS. Trend 1 is Control group compared with Model group; Trend 2 is Model group compared with TUDCA -H group.

| No. | Metabolite name                             | TR<br>(min) | m/z      | Formula                                                         | VIP   | <i>p</i> Value         | Fold<br>change | Trend 1 | Trend 2 | Scan<br>mode |
|-----|---------------------------------------------|-------------|----------|-----------------------------------------------------------------|-------|------------------------|----------------|---------|---------|--------------|
| 1   | LysoPE(18:0/0:0)                            | 4.02        | 481.3210 | C <sub>23</sub> H <sub>48</sub> NO <sub>7</sub> P               | 1.50  | 3.15×10 <sup>-2</sup>  | 2.55           | -       | ↓       | +            |
| 2   | PE(16:1(9Z)/22:4(7Z,10Z,13Z,16Z))           | 2.89        | 765.5312 | C <sub>43</sub> H <sub>76</sub> NO <sub>8</sub> P               | 4.40  | 4.01×10 <sup>-5</sup>  | 9.06           | -       | ↑       | +            |
| 3   | Pregnenolone sulfate                        | 1.31        | 396.1972 | C <sub>21</sub> H <sub>32</sub> O <sub>5</sub> S                | 1.46  | 3.50×10 <sup>-2</sup>  | 1.26           | -       | ↓       | +            |
| 4   | Glyceryl lactooleate                        | 3.58        | 428.3153 | C <sub>24</sub> H <sub>44</sub> O <sub>6</sub>                  | 2.65  | 2.22×10 <sup>-3</sup>  | 2.50           | -       | ↑       | +            |
| 5   | LysoPE(22:6(4Z,7Z,10Z,13Z,16Z,19Z)<br>/0:0) | 4.22        | 525.2856 | C <sub>27</sub> H <sub>44</sub> NO <sub>7</sub> P               | 1.37  | 4.26×10 <sup>-2</sup>  | 1.40           | -       | ↑       | -            |
| 6   | LysoPC(16:0/0:0)                            | 2.99        | 495.3367 | C <sub>24</sub> H <sub>50</sub> NO <sub>7</sub> P               | 1.54  | 2.85×10 <sup>-2</sup>  | 0.88           | -       | ↓       | +            |
| 7   | LysoPC(20:0/0:0)                            | 4.96        | 551.4001 | C <sub>28</sub> H <sub>58</sub> NO <sub>7</sub> P               | 10.43 | 3.75×10 <sup>-11</sup> | 1.74           | -       | ↓       | +            |
| 8   | PC(18:3(9Z,12Z,15Z)/18:2(9Z,12Z))           | 7.04        | 779.5492 | C <sub>44</sub> H <sub>78</sub> NO <sub>8</sub> P               | 1.56  | 2.74×10 <sup>-2</sup>  | 0.71           | ↓       | -       | -            |
| 9   | PC(16:0/16:0)                               | 7.40        | 733.5686 | C <sub>40</sub> H <sub>80</sub> NO <sub>8</sub> P               | 2.01  | 9.84×10 <sup>-3</sup>  | 0.85           | ↑       | -       | +            |
| 10  | LysoPC(0:0/18:0)                            | 3.87        | 523.3686 | C <sub>26</sub> H <sub>54</sub> NO <sub>7</sub> P               | 2.50  | 3.13×10 <sup>-3</sup>  | 1.28           | ↓       | -       | +            |
| 11  | Hypoxanthine                                | 0.63        | 136.0396 | C <sub>5</sub> H <sub>4</sub> N <sub>4</sub> O                  | 2.60  | 2.51×10 <sup>-3</sup>  | 0.23           | ↓       | -       | -            |
| 12  | PC(16:0/18:0)                               | 8.02        | 761.6001 | C <sub>42</sub> H <sub>84</sub> NO <sub>8</sub> P               | 5.44  | 3.64×10 <sup>-6</sup>  | 1.58           | ↑       | -       | +            |
| 13  | SM(d18:1/14:0)                              | 6.24        | 674.5401 | C <sub>37</sub> H <sub>75</sub> N <sub>2</sub> O <sub>6</sub> P | 10.24 | 5.75×10 <sup>-11</sup> | 2.39           | ↑       | -       | +            |
| 14  | SM(d18:1/22:0)                              | 8.76        | 786.6684 | C <sub>45</sub> H <sub>91</sub> N <sub>2</sub> O <sub>6</sub> P | 12.41 | 3.93×10 <sup>-13</sup> | 2.30           | ↑       | -       | +            |

**Table S5.** Detection of hyperlipidemia related metabolism in liver by UPLC-MS. Trend 1 is Control group compared with Model group; Trend 2 is Model group compared with TUDCA -H group.

| No. | Metabolite name               | TR<br>(min) | m/z      | Formula                                                        | VIP   | <i>p</i> Value         | Fold<br>change | Trend 1 | Trend 2 | Scan<br>mode |
|-----|-------------------------------|-------------|----------|----------------------------------------------------------------|-------|------------------------|----------------|---------|---------|--------------|
| 1   | LysoPC(14:0/0:0)              | 9.11        | 467.2984 | C <sub>22</sub> H <sub>46</sub> NO <sub>7</sub> P              | 8.39  | 4.06×10 <sup>-9</sup>  | 1.99           | ↑       | -       | +            |
| 2   | Stachydrine                   | 0.70        | 143.0952 | C <sub>7</sub> H <sub>13</sub> NO <sub>2</sub>                 | 8.33  | 4.72×10 <sup>-9</sup>  | 0.29           | ↓       | -       | +            |
| 3   | Adipic acid                   | 3.81        | 146.0572 | C <sub>6</sub> H <sub>10</sub> O <sub>4</sub>                  | 6.11  | 7.75×10 <sup>-7</sup>  | 1.93           | ↑       | ↑       | -            |
| 4   | Taurolithocholic acid sulfate | 10.55       | 563.2574 | C <sub>26</sub> H <sub>45</sub> NO <sub>8</sub> S <sub>2</sub> | 1.53  | 2.92×10 <sup>-2</sup>  | 0.82           | ↓       | -       | +            |
| 5   | PC(18:1(11Z)/18:2(9Z,12Z))    | 13.73       | 783.5728 | C <sub>44</sub> H <sub>82</sub> NO <sub>8</sub> P              | 1.37  | 4.22×10 <sup>-2</sup>  | 2.03           | ↑       | -       | +            |
| 6   | Arachidonic acid              | 13.03       | 304.2406 | C <sub>20</sub> H <sub>32</sub> O <sub>2</sub>                 | 13.05 | 8.94×10 <sup>-14</sup> | 3.84           | -       | ↑       | -            |
| 7   | Creatine                      | 0.66        | 131.0698 | C <sub>4</sub> H <sub>9</sub> N <sub>3</sub> O <sub>2</sub>    | 1.63  | 2.33×10 <sup>-2</sup>  | 0.51           | -       | ↓       | +            |
| 8   | Indolelactic acid             | 5.26        | 205.0735 | C <sub>11</sub> H <sub>11</sub> NO <sub>3</sub>                | 2.73  | 1.86×10 <sup>-3</sup>  | 2.01           | -       | ↑       | -            |
| 9   | Adenosine                     | 2.11        | 267.0981 | C <sub>10</sub> H <sub>13</sub> N <sub>5</sub> O <sub>4</sub>  | 3.32  | 4.73×10 <sup>-4</sup>  | 0.64           | -       | ↓       | +            |
| 10  | Cholesterol sulfate           | 12.69       | 466.3120 | C <sub>27</sub> H <sub>46</sub> O <sub>4</sub> S               | 1.77  | 1.68×10 <sup>-2</sup>  | 8.46           | -       | ↑       | -            |
| 11  | Glycylleucine                 | 3.48        | 188.1155 | C <sub>8</sub> H <sub>16</sub> N <sub>2</sub> O <sub>3</sub>   | 6.32  | 4.80×10 <sup>-7</sup>  | 3.68           | -       | ↑       | -            |
| 12  | D-Tryptophan                  | 3.90        | 204.0895 | C <sub>11</sub> H <sub>12</sub> N <sub>2</sub> O <sub>2</sub>  | 12.50 | 3.16×10 <sup>-13</sup> | 4.11           | -       | ↑       | -            |
| 13  | Glycodeoxycholic acid         | 7.16        | 449.3152 | C <sub>26</sub> H <sub>43</sub> NO <sub>5</sub>                | 6.26  | 5.48×10 <sup>-7</sup>  | 26.72          | -       | ↑       | -            |
| 14  | 4-Pyridoxic acid              | 1.88        | 183.0523 | C <sub>8</sub> H <sub>9</sub> NO <sub>4</sub>                  | 4.48  | 3.35×10 <sup>-5</sup>  | 0.65           | -       | ↓       | -            |
| 15  | Tauroursodeoxycholic acid     | 6.05        | 499.2969 | C <sub>26</sub> H <sub>45</sub> NO <sub>6</sub> S              | 2.97  | 1.07×10 <sup>-3</sup>  | 11.47          |         | ↑       | -            |

**Table S6.** Detection of hyperlipidemia related lipid metabolism in liver by UPLC-MS. Trend 1 is Control group compared with Model group; Trend 2 is Model group compared with TUDCA -H group.

| No. | Metabolite name                          | TR (min) | m/z      | Formula                                           | VIP  | <i>p</i> Value         | Fold change | Trend 1 | Trend 2 | Scan mode |
|-----|------------------------------------------|----------|----------|---------------------------------------------------|------|------------------------|-------------|---------|---------|-----------|
| 1   | PC(16:0/18:0)                            | 7.88     | 807.5949 | C <sub>42</sub> H <sub>84</sub> NO <sub>8</sub> P | 2.21 | 6.14×10 <sup>-3</sup>  | 1.34        | ↑       | ↓       | -         |
| 2   | PE(16:0/18:1(9Z))                        | 7.76     | 717.5387 | C <sub>39</sub> H <sub>76</sub> NO <sub>8</sub> P | 1.30 | 5.00×10 <sup>-2</sup>  | 0.98        | -       | ↓       | +         |
| 3   | PC(16:0/16:0)                            | 7.51     | 733.5705 | C <sub>40</sub> H <sub>80</sub> NO <sub>8</sub> P | 1.69 | 2.04×10 <sup>-2</sup>  | 0.73        | ↑       | -       | +         |
| 4   | PE(16:0/18:3(6Z,9Z,12Z))                 | 6.98     | 713.5071 | C <sub>39</sub> H <sub>72</sub> NO <sub>8</sub> P | 1.33 | 4.72×10 <sup>-2</sup>  | 1.41        | -       | ↓       | +         |
| 5   | PE(18:3(6Z,9Z,12Z)/22:4(7Z,10Z,13Z,16Z)) | 6.89     | 789.5282 | C <sub>45</sub> H <sub>76</sub> NO <sub>8</sub> P | 3.21 | 6.13×10 <sup>-4</sup>  | 1.58        | ↑       | -       | -         |
| 6   | PG(18:1(9Z)/18:1(9Z))                    | 6.57     | 774.5371 | C <sub>42</sub> H <sub>79</sub> O <sub>10</sub> P | 9.50 | 3.17×10 <sup>-10</sup> | 2.57        | ↑       | -       | -         |
| 7   | LysoPC(20:0/0:0)                         | 5.17     | 551.4012 | C <sub>28</sub> H <sub>58</sub> NO <sub>7</sub> P | 2.80 | 1.58×10 <sup>-3</sup>  | 2.07        | ↑       | -       | +         |
| 8   | LysoPE(18:0/0:0)                         | 4.44     | 481.322  | C <sub>23</sub> H <sub>48</sub> NO <sub>7</sub> P | 2.95 | 1.13×10 <sup>-3</sup>  | 2.64        | ↑       | -       | +         |
| 9   | LysoPC(0:0/18:0)                         | 4.30     | 523.3694 | C <sub>26</sub> H <sub>54</sub> NO <sub>7</sub> P | 2.36 | 4.37×10 <sup>-3</sup>  | 1.77        | ↑       | -       | +         |
| 10  | Glyceryl lactooleate                     | 3.81     | 428.3158 | C <sub>24</sub> H <sub>44</sub> O <sub>6</sub>    | 1.73 | 1.88×10 <sup>-2</sup>  | 0.42        | ↓       | -       | +         |
| 11  | LysoPE(16:0/0:0)                         | 3.34     | 453.2904 | C <sub>21</sub> H <sub>44</sub> NO <sub>7</sub> P | 1.57 | 2.71×10 <sup>-2</sup>  | 1.21        | ↑       | ↓       | +         |
